# Supplementary material for: Monodisperse and brightly luminescent CsPbBr3/Cs4PbBr6 perovskite composite nanocrystals
Source: Royal Society of Chemistry journal article supplement (doi:10.1039/c8nr01266k), 2018-01-01
Supplement: c8nr01266k1.pdf [file c8nr01266k1.pdf]

## ***Supporting Information***

# Monodisperse and Brightly Luminescent CsPbBr<sub>3</sub>/Cs<sub>4</sub>PbBr<sub>6</sub> Perovskite Composite Nanocrystals

*Tongtong Xuan,<sup>‡a</sup> Sunqi Lou, <sup>‡a,b</sup> Junjian Huang,<sup>a</sup> Luyu Cao,<sup>a</sup> Xianfeng Yang,<sup>c</sup> Huili Li,<sup>b</sup> and Jing Wang<sup>\*a</sup>*

<sup>a</sup> Ministry of Education Key Laboratory of Bioinorganic and Synthetic Chemistry,  
State Key Laboratory of Optoelectronic Materials and Technologies, School of  
Chemistry, School of Materials Science and Engineering, Sun Yat-Sen University,  
Guangzhou, Guangdong 510275, China.

<sup>b</sup> Engineering Research Center for Nanophotonics & Advanced Instrument, Ministry  
of Education, School of Physics and Materials Science, East China Normal  
University, Shanghai 200062, China.

<sup>c</sup> Analytical and Testing Centre, South China University of Technology, Guangzhou,  
Guangdong 510640, China.

### **Corresponding Author**

\*Email: [ceswj@mail.sysu.edu.cn](mailto:ceswj@mail.sysu.edu.cn) (J.W.)

<sup>‡</sup> These authors contributed equally to this work.

## Experimental Section

### Chemicals.

Cesium bromide (CsBr, 99.9%, Aldrich), lead(II) bromide (PbBr<sub>2</sub>, 98%, Aldrich), 2-Methylimidazole (MeIm, 98%, Aladdin), oleic acid (OA, 90%, Aldrich), oleylamine (OAm, 70%, Aldrich), *N,N*-dimethylformamide (DMF, 99.8%, Aladdin), cyclohexane (>99.5%, Aladdin), toluene (TOL, 99.5%, Sinopharm Chemical Reagent Co., Ltd, China). All reagents were used as received without further purification.

### Synthesis of CsPbBr<sub>3</sub> embedded in Cs<sub>4</sub>PbBr<sub>6</sub> composite (CPB<sub>113</sub>/CPB<sub>416</sub>) NCs.

Typically, PbBr<sub>2</sub> (0.1 mmol), CsBr (0.4 mmol), and MeIm (0.1mmol) were added to a mixture solution of 0.2 mL OA, 0.5 mL OAm, and 10 mL DMF. The solution was kept stirring for 1h, 4h, or 24h. After is, 0.2 mL the solution was quickly injected into toluene (5 mL) solution under vigorous stirring for 1min. Finally, the CPB<sub>113</sub>/CPB<sub>416</sub> NCs were centrifuged at 5000 rpm for 5min and washed twice by toluene. The NCs powders were obtained by drying under vacuum and stored under ambient condition.

### Synthesis of CsPbBr<sub>3</sub>/Cs<sub>4</sub>PbBr<sub>6</sub> composite (CPB<sub>113</sub>/CPB<sub>416</sub>) NCs without using MeIm.

Similar as the CPB<sub>113</sub>/CPB<sub>416</sub> NCs preparation approach, the CPB<sub>113</sub>-CPB<sub>416</sub> NCs were synthesized by without using MeIm.

### Synthesis of CsPbX<sub>3</sub> embedded in Cs<sub>4</sub>PbX<sub>6</sub> composite (CPX<sub>113</sub>/CPX<sub>416</sub>) NCs.

Similar as CPB<sub>113</sub>/CPB<sub>416</sub> NCs preparation approach, CsPb(Br/Cl)<sub>3</sub> embedded in Cs<sub>4</sub>Pb(Br/Cl)<sub>6</sub> (CPBC<sub>113</sub>/CPBC<sub>416</sub>) NCs and CsPb(Br/I)<sub>3</sub> embedded in Cs<sub>4</sub>Pb(Br/I)<sub>6</sub>

(CPBI<sub>113</sub>/CPBI<sub>416</sub>) NCs were performed by blending appropriate reagents (CsCl, PbCl<sub>2</sub>, CsI, PbI<sub>2</sub>, CsBr, and PbBr<sub>2</sub>) in DMF solution.

**Optical properties characterization.** UV/vis absorption spectra were collected by using a Cary 5000 UV/vis/NIR spectrophotometer (Varian Instruments). The PL spectra and the decay curves were measured by Edinburgh instruments FLS920. The PLQYs were performed at an excitation wavelength of 365 nm on the Hamamatsu instruments C9920.

The PL decay can be fitted by the double-exponential equation

$$I = A_1 e^{(-t/\tau_1)} + A_2 e^{(-t/\tau_2)} \quad (S1)$$

Where  $\tau_1$  and  $\tau_2$  are the fast and slow lived PL lifetime.  $A_1$  and  $A_2$  are the corresponding fitting parameters. The average PL lifetime can be further evaluated by the following equation:

$$\tau_{avg} = (A_1 \tau_1^2 + A_2 \tau_2^2) / (A_1 \tau_1 + A_2 \tau_2) \quad (S2)$$

**X-ray diffraction (XRD) patterns.** The powder X-ray diffraction was measured on a Rigaku D/MAX 2200 VPC using a Cu Kr radiation ( $\lambda = 1.5405 \text{ \AA}$ ).

**Transmission electron microscope (TEM) images** were acquired on a FEI Tecnai G2 Spirit instrument with an accelerating voltage of 120 kV. High resolution TEM (HR-TEM) images and energy dispersive spectra (EDS), high angle annular dark field scanning transmission electron microscopy (HAADF-STEM) images, and elemental mapping images were acquired on a JEOL-JEM 2100F transmission electron microscope an accelerating voltage of 200 kV and an energy dispersive detector.

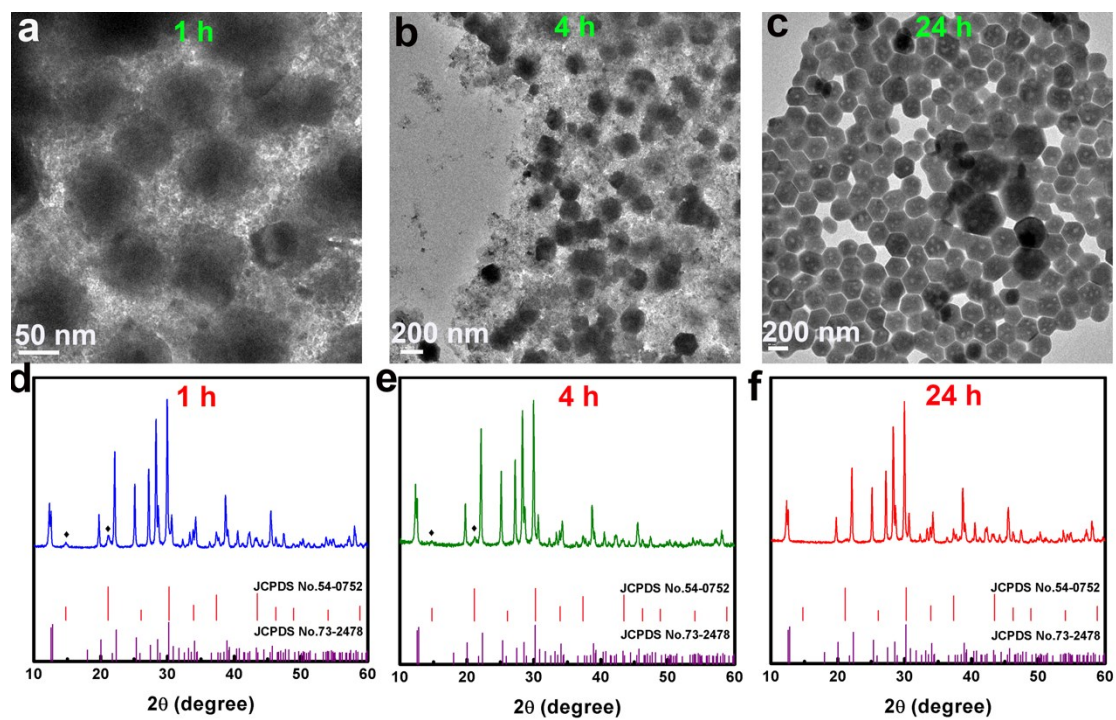

**Fig. S1.** The TEM images (a-c) and XRD patterns (d-f) of CsPbBr<sub>3</sub>-Cs<sub>4</sub>PbBr<sub>6</sub> composite NCs synthesized

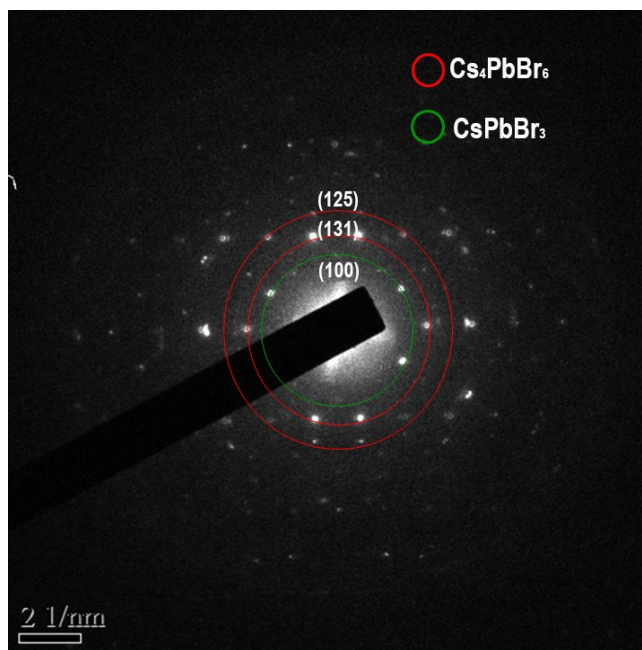

**Fig. S2.** The SAED images of CPB<sub>113</sub>/CPB<sub>416</sub> NCs.

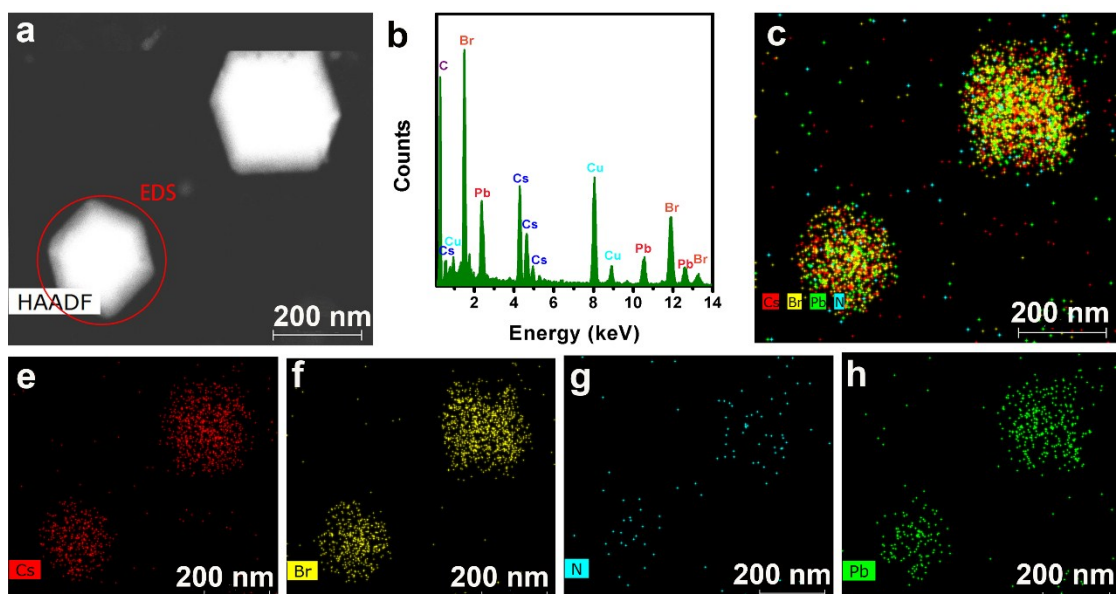

**Fig. S3.** HAADF-STEM image (a), EDS spectrum (b), and elemental mappings (c-h) of as-prepared CPB<sub>113</sub>/CPB<sub>416</sub> NCs.

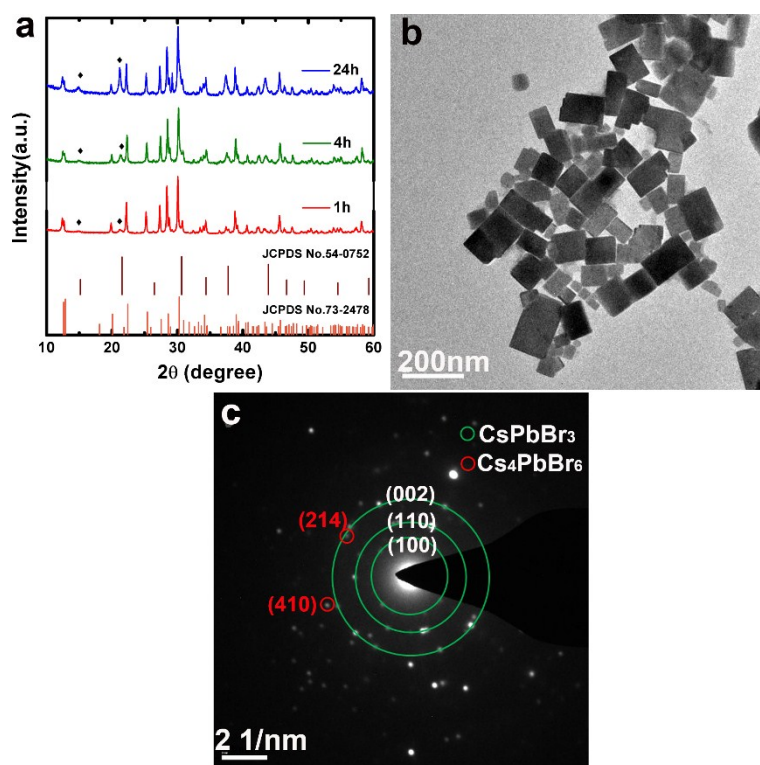

**Fig. S4.** The XRD patterns (a), TEM image, (b), and SAED (c) of CsPbBr<sub>3</sub>-Cs<sub>4</sub>PbBr<sub>6</sub> composite NCs prepared by without using MeIm as capping ligands.

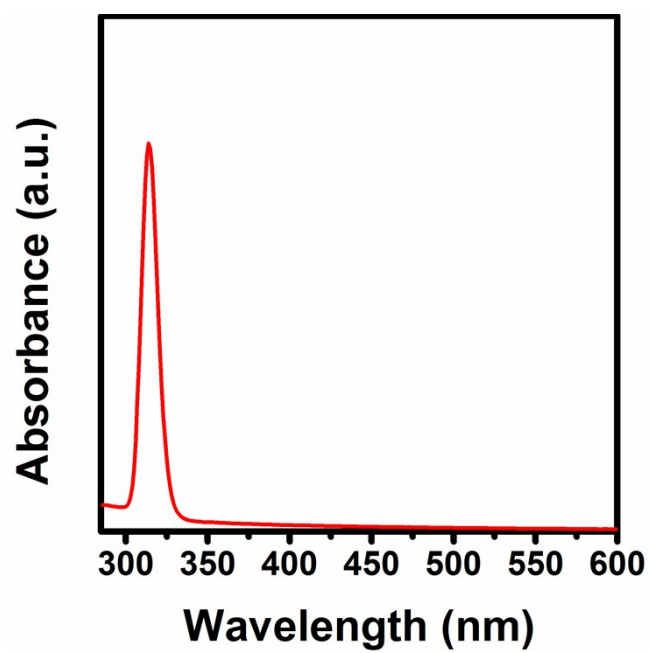

**Fig. S5.** The absorption spectrum of Cs<sub>4</sub>PbBr<sub>6</sub> NCs.

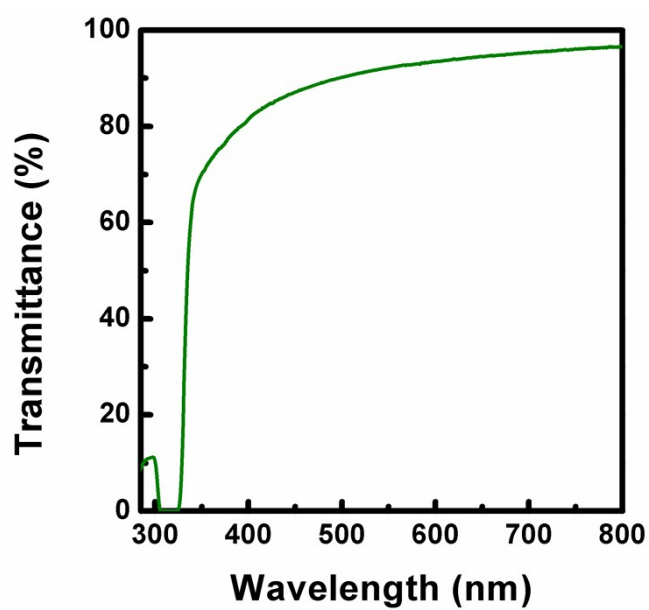

**Fig. S6.** The transmittance of Cs<sub>4</sub>PbBr<sub>6</sub> NCs.

**Tab. S1.** The comparison of PLQY of the composite perovskite solids.

| Composition                                            | Size               | PLQY (%) | Ref.      |
|--------------------------------------------------------|--------------------|----------|-----------|
| Cs <sub>4</sub> PbBr <sub>6</sub>                      | -                  | 45       | 1         |
| Cs <sub>4</sub> PbBr <sub>6</sub>                      | >1 $\mu$ m         | 40-45    | 2         |
| CsPbBr <sub>3</sub> -Cs <sub>4</sub> PbBr <sub>6</sub> | $\sim$ 1 $\mu$ m   | -        | 3         |
| Cs <sub>4</sub> PbBr <sub>6</sub>                      | $\sim$ 30 nm       | 54       | 4         |
| CPB <sub>113</sub> in CPB <sub>416</sub>               | -                  | 55       | 5         |
| Cs <sub>4</sub> PbBr <sub>6</sub>                      | $\sim$ 100 $\mu$ m | 40       | 6         |
| CPB <sub>113</sub> in CPB <sub>416</sub>               | $\sim$ 200 nm      | 83       | This work |

**Tab. S2.** The lifetimes, fitting parameters of CPB<sub>113</sub>/CPB<sub>416</sub> NCs.

| $\lambda_{\text{ex}}/\text{nm}$ | A <sub>1</sub> /% | $\tau_1/\text{ns}$ | A <sub>2</sub> /% | $\tau_2/\text{ns}$ | $\tau_{\text{avg}}/\text{ns}$ |
|---------------------------------|-------------------|--------------------|-------------------|--------------------|-------------------------------|
| 289                             | 64.7              | 7.1                | 35.3              | 38.1               | 29.9                          |
| 365                             | 85.3              | 6.0                | 14.7              | 34.6               | 20.2                          |

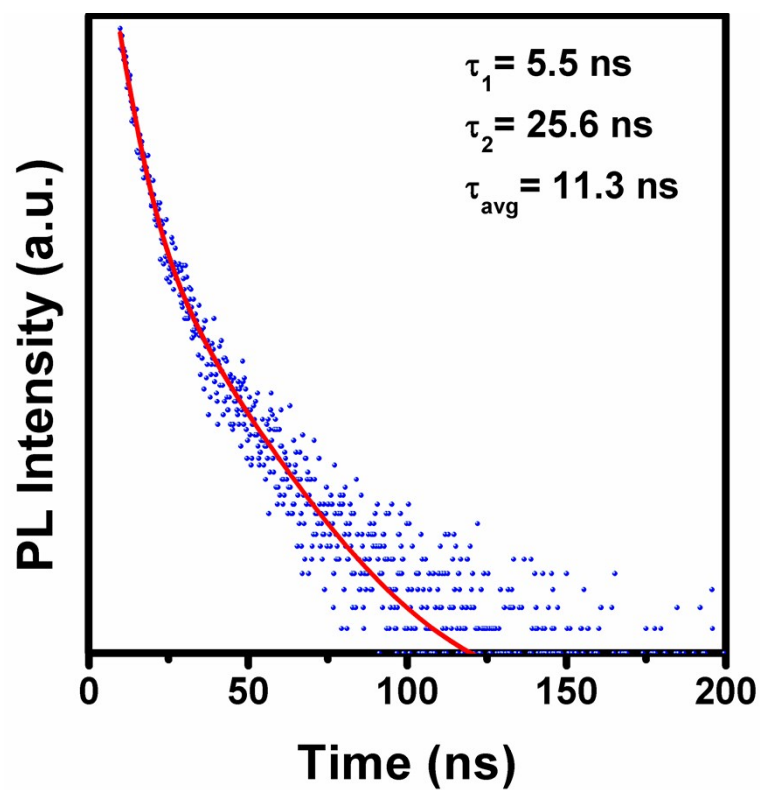

**Fig. S7.** Time-resolved PL decay of CsPbBr<sub>3</sub> NCs synthesized by hot-injection method.

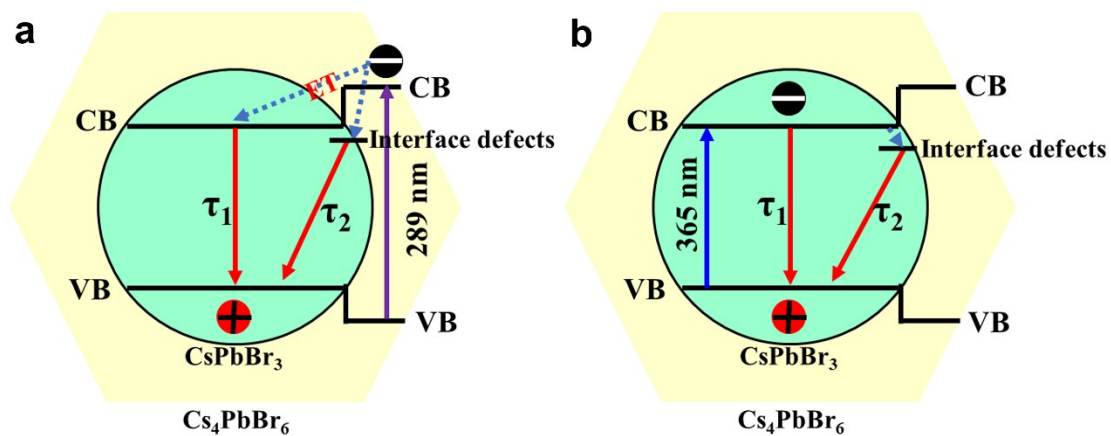

**Fig. S8.** Schematic illustration of the possible recombination in the CPB<sub>113</sub>/CPB<sub>416</sub> composite NCs excited by 289nm and 365 nm, respectively.



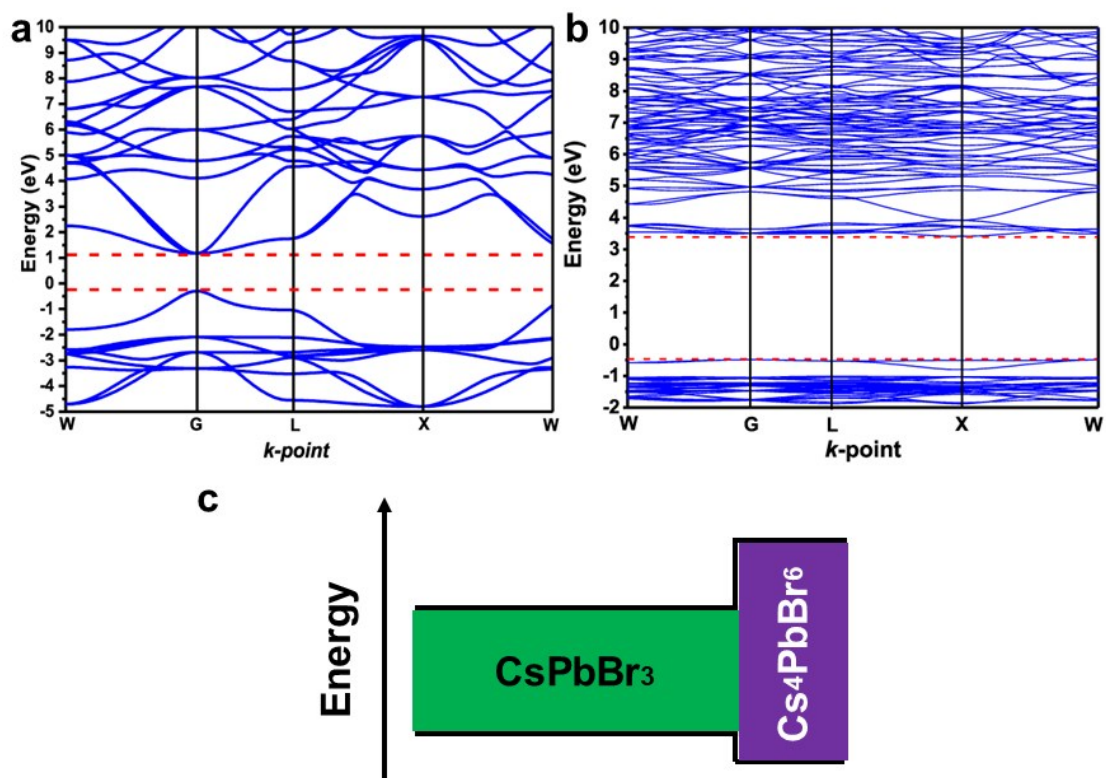

**Fig. S9.** The electronic band structures of  $\text{CsPbBr}_3$  (a) and  $\text{Cs}_4\text{PbBr}_6$  (b), respectively.

(c) Schematic representation of Type I  $\text{CsPbBr}_3/\text{Cs}_4\text{PbBr}_6$  core/shell structure.

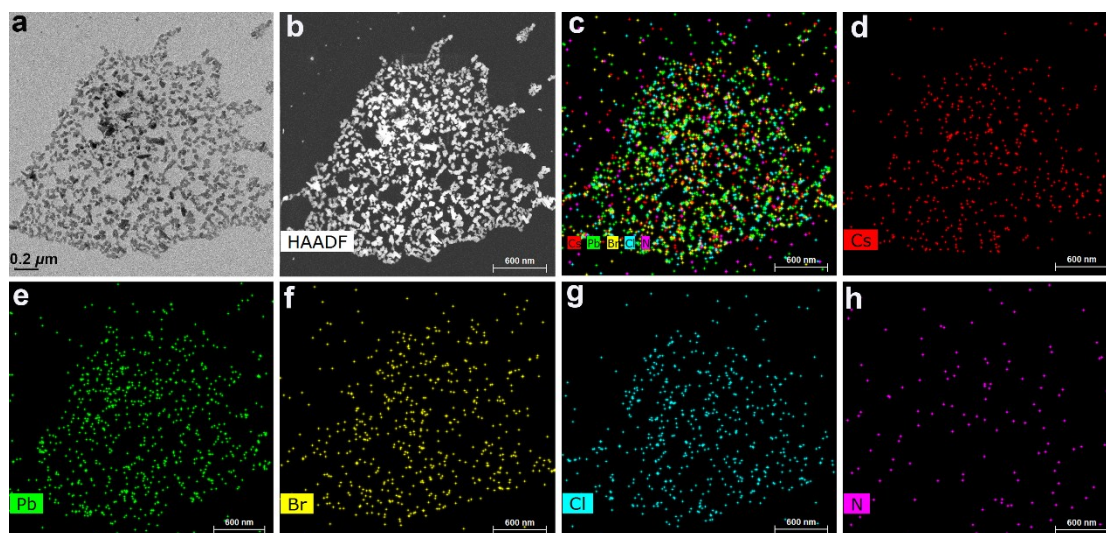

**Fig. S10.** The TEM image (a), HAADF-STEM image (b), and elemental mappings (c-h) of CPBC<sub>113</sub>/CPBC<sub>416</sub> NCs.

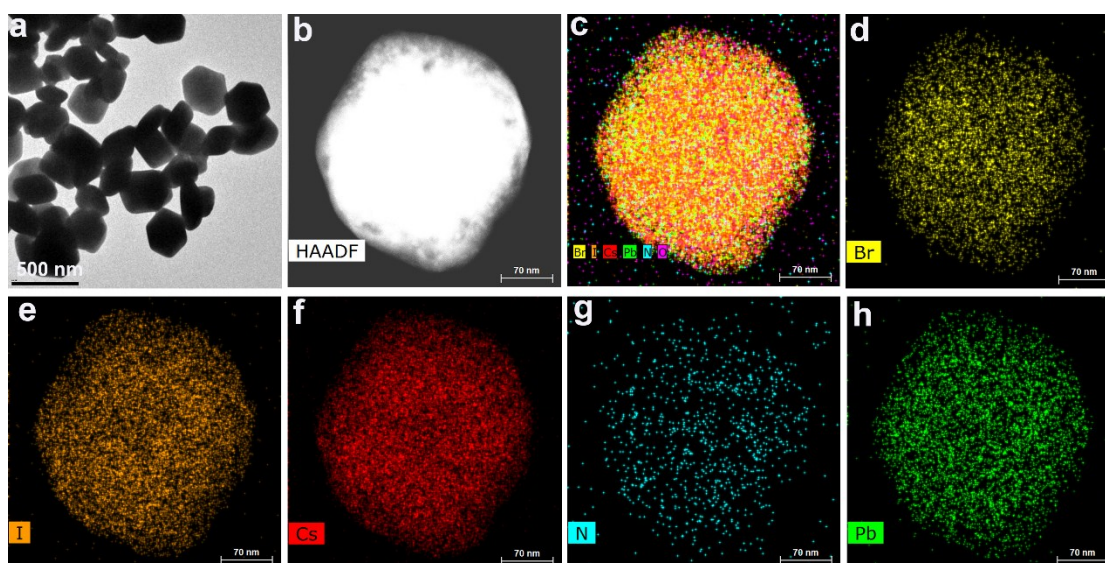

**Fig. S11.** The TEM image (a), HAADF-STEM image (b), and elemental mappings (c-h) of CPBI<sub>113</sub>/CPBI<sub>416</sub> NCs.

**Tab. S3.** The PL peaks, FWHM, and PLQY of CPX<sub>113</sub>/CPX<sub>416</sub> NCs.

| Sample | PL peaks | FWHM | PLQY |
|--------|----------|------|------|
|        | (nm)     | (nm) | (%)  |
| Blue   | 460      | 17   | 40   |
| Green  | 517      | 20   | 83   |
| Red    | 625      | 59   | 32   |

**Tab. S4.** The lifetimes, fitting parameters of CPX<sub>113</sub>/CPX<sub>416</sub> NCs.

| Sample | A <sub>1</sub> | $\tau_1/\text{ns}$ | A <sub>2</sub> | $\tau_2/\text{ns}$ | $\tau_{\text{avg}}/\text{ns}$ |
|--------|----------------|--------------------|----------------|--------------------|-------------------------------|
| Blue   | 14.4           | 3.23               | 0.3            | 25.4               | 6.5                           |
| Green  | 2.9            | 6.0                | 0.5            | 34.6               | 20.2                          |
| Red    | 0.9            | 16.9               | 0.5            | 67.3               | 51.4                          |

## References

- (1) Saidaminov, M. I.; Almutlaq, J.; Sarmah, S.; Dursun, I.; Zhumekenov, A. A.; Begum, R.; Pan, J.; Cho, N.; Mohammed, O. F.; Bakr, O. M. Pure Cs<sub>4</sub>PbBr<sub>6</sub>: Highly Luminescent Zero-Dimensional Perovskite Solids. *ACS Energy Lett.* **2016**, *1* (4), 840.
- (2) Chen, D.; Wan, Z.; Chen, X.; Yuan, Y.; Zhong, J. Large-Scale Room-Temperature Synthesis and Optical Properties of Perovskite-Related Cs<sub>4</sub>PbBr<sub>6</sub> Fluorophores. *J. Mater. Chem. C* **2016**, *4* (45), 10646.
- (3) Ling, Y.; Tan, L.; Wang, X.; Zhou, Y.; Xin, Y.; Ma, B.; Hanson, K.; Gao, H. Composite Perovskites of Cesium Lead Bromide for Optimized Photoluminescence. *J. Phys. Chem. Lett.* **2017**, *8* (14), 3266.
- (4) Zhang, Y.; Saidaminov, M. I.; Dursun, I.; Yang, H.; Murali, B.; Alarousu, E.; Yengel, E.; Alshankiti, B. A.; Bakr, O. M.; Mohammed, O. F. Zero-Dimensional Cs<sub>4</sub>PbBr<sub>6</sub> Perovskite Nanocrystals. *J. Phys. Chem. Lett.* **2017**, *8* (5), 961.
- (5) Wang, Y.; Yu, D.; Wang, Z.; Li, X.; Chen, X.; Nalla, V.; Zeng, H.; Sun, H. Solution-Grown CsPbBr<sub>3</sub>/Cs<sub>4</sub>PbBr<sub>6</sub> Perovskite Nanocomposites: Toward

Temperature-Insensitive Optical Gain. *Small* **2017**, *13* (34), 1701587.

- (6) De Bastiani, M.; Dursun, I.; Zhang, Y.; Alshankiti, B. A.; Miao, X.-H.; Yin, J.; Yengel, E.; Alarousu, E.; Turedi, B.; Almutlaq, J. M. et al. Inside Perovskites: Quantum Luminescence from Bulk  $\text{Cs}_4\text{PbBr}_6$  Single Crystals. *Chem. Mater.* **2017**, *29* (17), 7108.
